# Supplementary material for: Water flow and finger-tapping mediated piezoelectric energy generation using a natural hematite-based flexible PVDF-HFP membrane
Source: Royal Society of Chemistry journal article supplement (doi:10.1039/d3tc01920a), 2023-01-01
Supplement: d3tc01920a1.pdf [file d3tc01920a1.pdf]

## **Supporting Information**

### **Water flow and finger-tapping mediated piezoelectric energy generation using natural hematite-based flexible PVDF-HFP membrane**

Saheli Ghosh<sup>1</sup>, Dhananjay Mondal<sup>1</sup>, Shubham Roy<sup>2</sup>, Jhilik Roy<sup>1,3</sup>, Souravi Bardhan<sup>4</sup>, Ayan Mazumder<sup>1</sup>, Neelanjana Bag<sup>1</sup>, Ruma Basu<sup>3</sup>, Sukhen Das<sup>1\*</sup>

<sup>1</sup> Department of Physics, Jadavpur University, Kolkata-700032, India

<sup>2</sup> Shenzhen Key Laboratory of Advanced Functional Carbon Materials Research and Comprehensive Application, Shenzhen Key Laboratory of Flexible Printed Electronics Technology, and School of Science, Harbin Institute of Technology, Shenzhen 518055, China.

<sup>3</sup> Department of Physics, Jogamaya Devi College, Kolkata- 700026, India

<sup>4</sup> Department of Environmental Science, Netaji Nagar College for Women, Kolkata-700092, India

#### **\*Corresponding Author:**

Prof. Sukhen Das

[sdasphysics@gmail.com](mailto:sdasphysics@gmail.com) (+91 9433091337)

S1: FTIR of Hematite and Gd incorporated hematite nanoparticles

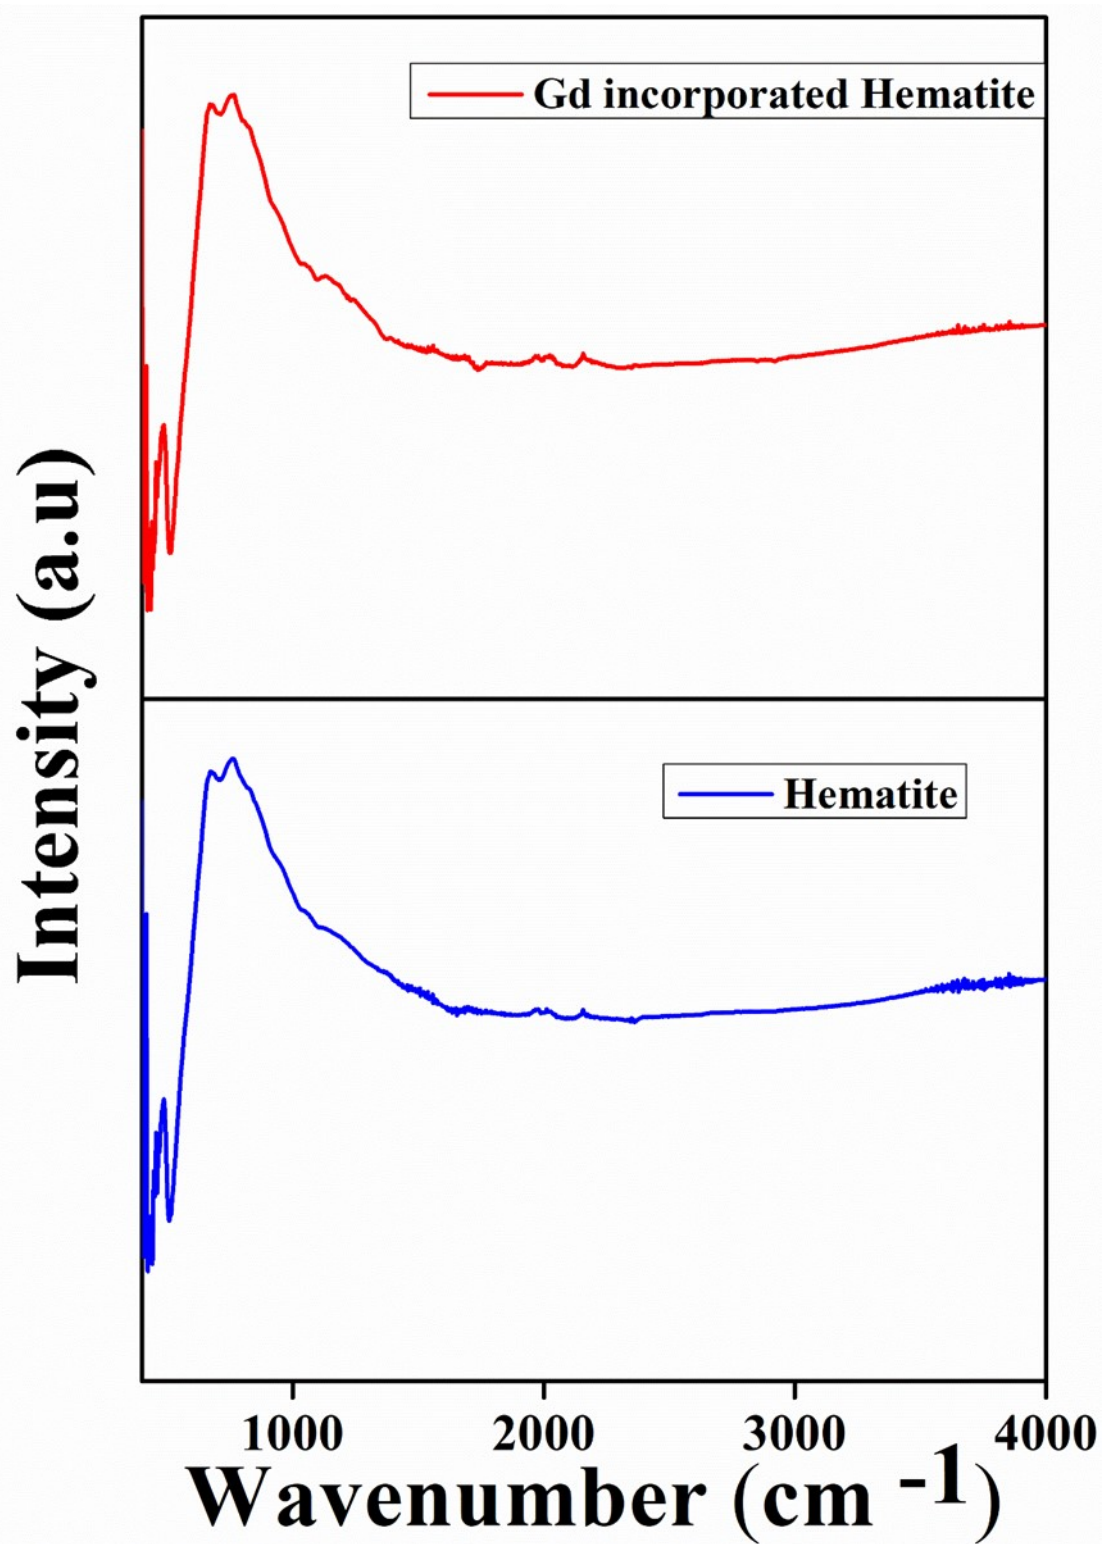

### S2: FTIR of 2.5% hematite doped PVDF membrane

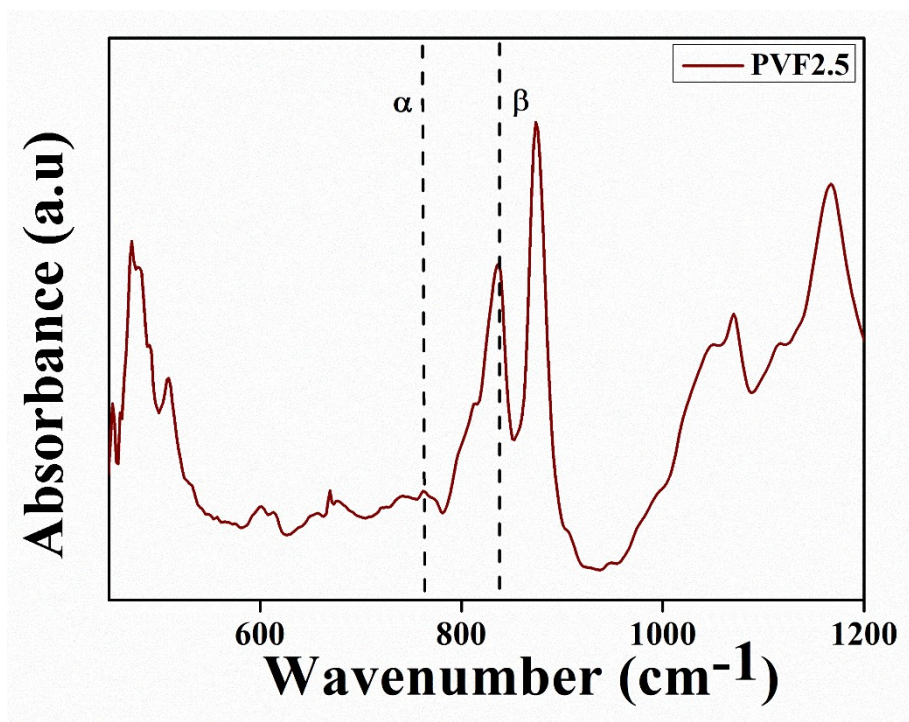

### S3: Zeta Potential of natural $\alpha$ -hematite

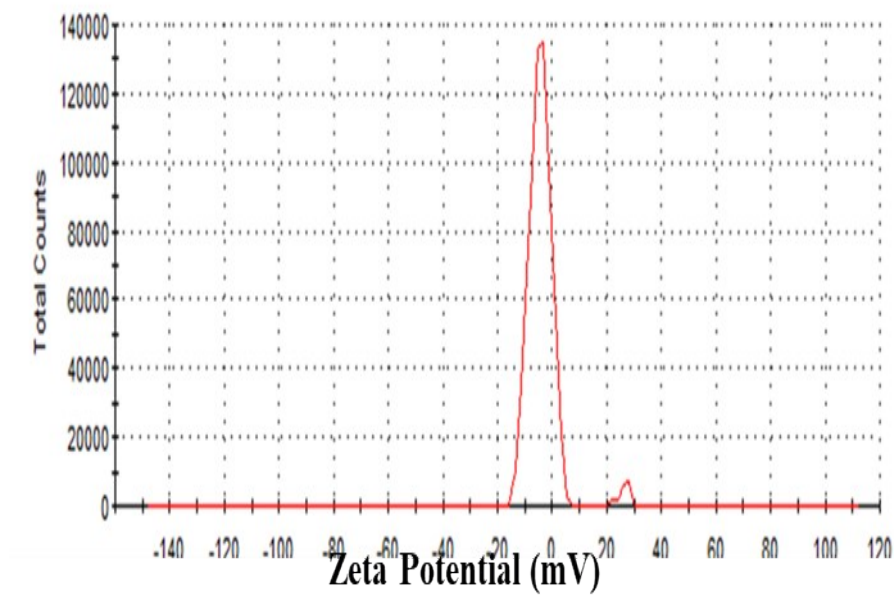

**S4: FESEM of Gd incorporated  $\alpha$ -hematite (a) and mapping (b-d) of PVGF2.5 membrane suggesting the homogeneous distribution of doped Gd incorporated in  $\alpha$ -hematite**

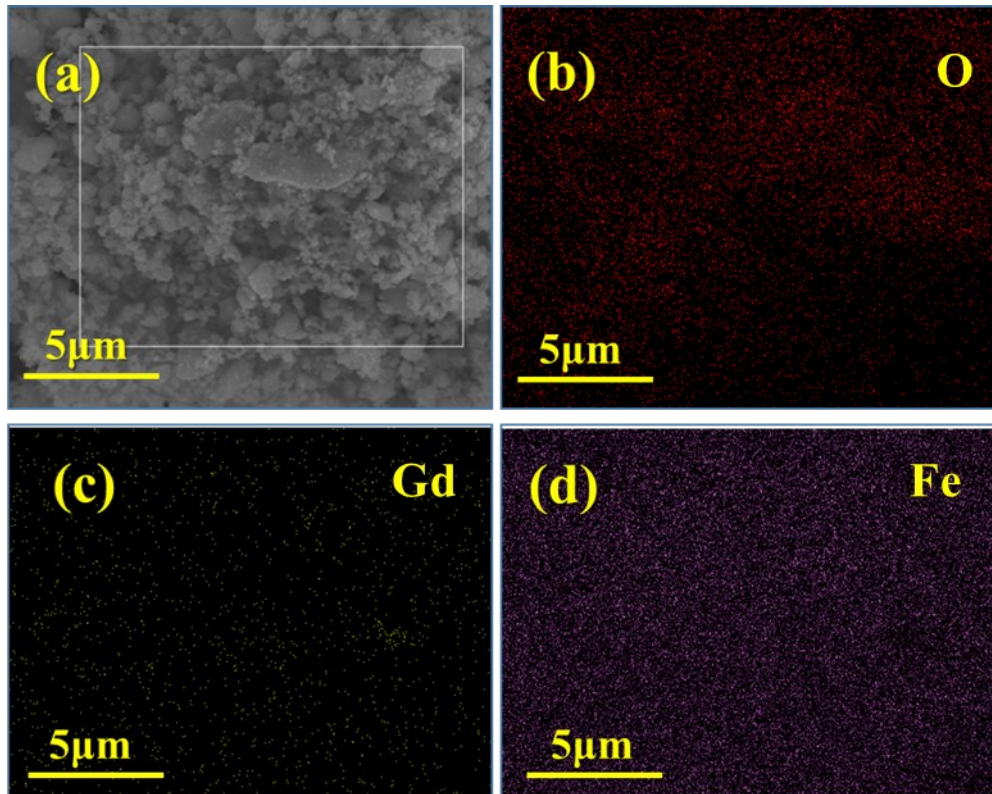

**S5: Formulation of force calculation:**

The velocity has been calculated from the relation of conservation of energy,

$$mgh = \frac{1}{2} mv^2 \dots \dots \dots (1)$$

where m is the mass, g is the gravitational constant, h is the height from where the mass departed on the membrane, and v is the velocity.

Secondly,

$$mv = (F-mg) \Delta t \dots \dots \dots (2)$$

$$F = m (v/\Delta t + g) \dots \dots \dots (3)$$

Initially, applying the mass 0.016 kg, h 0.1 m, and  $\Delta t$  is the impulsive time calculated from the open circuit voltage graph (FWHM) and found  $\Delta t = 0.0018$  s.

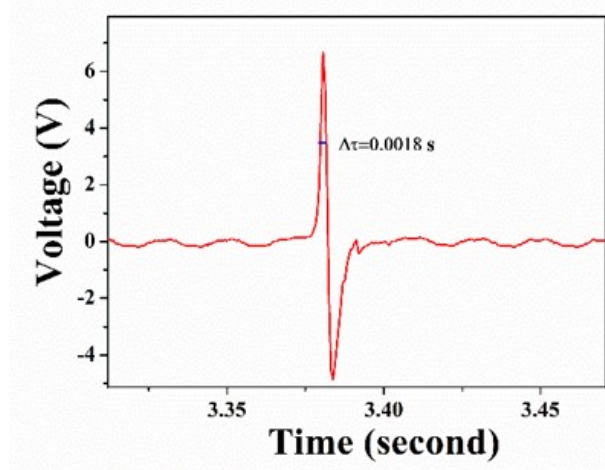

From equation 3 we have calculated the force and found 13.49 N.

The force has been varied by applying different masses.

#### S6: Formulation of force calculation:

| Sample Type | d <sub>33</sub> | Avg.   | Std. Deviation |
|-------------|-----------------|-----------------|-----------------|-----------------|-----------------|--------|----------------|
| PVGF0       | 4.15            | 4.74            | 4.92            | 5.12            | 4.81            | 4.748  | 0.363827       |
| PVGF2.5     | 49.7            | 47.44           | 45.8            | 48.29           | 45.39           | 47.324 | 1.778688       |
| PVGF5       | 25.07           | 27.83           | 28.52           | 26.54           | 27.29           | 27.05  | 1.323575       |

#### S7: Force-dependent voltage generation for PVGF2.5

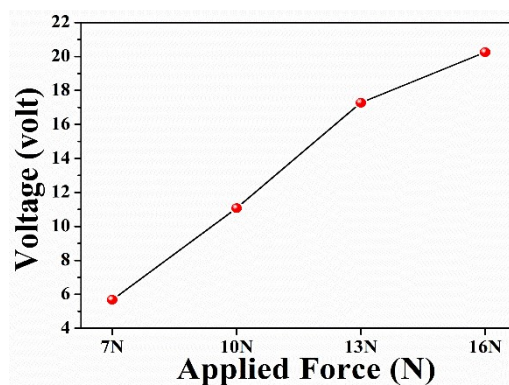

**S8: Water flow-mediated energy generation and detail setup**

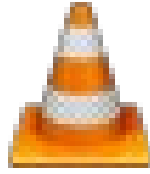

PVGF2.5\_Energy generation.mp4
